# Supplementary material for: Hypothalamic insulin resistance in type 2 diabetes is localized to the posterior hypothalamus
Source: JCI journal article supplement (doi:10.1172/jci.insight.198707), 2026-06-08

1 Supplemental Table 1. Association between LHAp at 5 and 10 minutes and metabolic parameters after  
 2 adjustment for glycemic status

|                                | LHAp (5) |            |         | LHAp (10) |            |         |
|--------------------------------|----------|------------|---------|-----------|------------|---------|
|                                | B        | 95%CI      | P value | B         | 95%CI      | P value |
| Age (years)                    | 2.90     | -1.07—6.86 | 0.147   | 0.43      | -3.09—3.95 | 0.807   |
| BMI (kg/m <sup>2</sup> )       | 6.39     | -6.03—18.8 | 0.304   | -1.58     | -12.4—9.28 | 0.770   |
| Percent body fat (%)           | 3.66     | -0.91—8.24 | 0.114   | 0.94      | -3.13—5.02 | 0.642   |
| Fasting plasma glucose (mg/dL) | 1.29     | 0.46—2.11  | 0.003   | 0.85      | 0.09—1.60  | 0.029   |
| HbA <sub>1c</sub> (%)          | 39.0     | 5.68—72.2  | 0.023   | 20.8      | -9.24—50.8 | 0.169   |
| Fasting serum insulin (μU/mL)  | 0.68     | -4.80—6.17 | 0.802   | -1.58     | -6.29—3.14 | 0.502   |
| Triglycerides (mg/dL)          | 0.10     | -0.03—0.24 | 0.138   | 0.08      | -0.04—0.19 | 0.207   |
| HDL-C (mg/dL)                  | 0.37     | -1.15—1.89 | 0.627   | -0.32     | -1.64—0.99 | 0.621   |
| Leptin (ng/ml)                 | 2.60     | -1.39—6.60 | 0.194   | -0.25     | -3.77—3.27 | 0.886   |
| HOMA-IR                        | 7.06     | -8.85—23.0 | 0.374   | -0.85     | -14.7—13.0 | 0.902   |
| Adipo-IR                       | 0.00     | -0.01—0.01 | 0.473   | 0.00      | -0.01—0.01 | 0.931   |

3 B and 95% CI are expressed per 10<sup>-4</sup> units.

4 Abbreviations: LHAp, posterior region of the lateral hypothalamic area; CI, Confidence Interval; HbA<sub>1c</sub>,  
 5 glycosylated hemoglobin; HDL-C, High-density lipoprotein cholesterol; HOMA-IR, homeostasis model  
 6 assessment of insulin resistance; Adipo-IR, adipose insulin resistance index.

7 Supplementary Table 2. Clinical characteristics of the study participants in Study 2.

|                                                 | Non-DM                  | DM                        | P value |
|-------------------------------------------------|-------------------------|---------------------------|---------|
| Number of subjects                              | 1400                    | 209                       |         |
| Female (%)                                      | 60.3%                   | 39.7%                     | <0.001  |
| Age                                             | 73.0±5.4                | 74.2±5.3                  | 0.002   |
| Body Mass Index (kg/m <sup>2</sup> )            | 22.6±3.0                | 23.9±3.3                  | <0.001  |
| Percent Body Fat (%)                            | 28.1±7.2                | 29.3±7.4                  | 0.027   |
| Skeletal Muscle Mass Index (kg/m <sup>2</sup> ) | 6.4±1.0                 | 6.7±1.0                   | <0.001  |
| Subcutaneous fat area (cm <sup>2</sup> )        | 148.4±58.3              | 149.2±61.2                | 0.842   |
| Visceral fat area (cm <sup>2</sup> )            | 75.0±36.9               | 101.6±42.8                | <0.001  |
| Hypertension (%)                                | 64.1%                   | 78.9%                     | <0.001  |
| Dyslipidemia (%)                                | 60.6%                   | 78.0%                     | <0.001  |
| Cerebrovascular disease (%)                     | 3.9%                    | 5.3%                      | 0.454   |
| Ischemic heart disease (%)                      | 3.5%                    | 12.0%                     | <0.001  |
| MMSE                                            | 27.7±1.9                | 27.6±2.1                  | 0.515   |
| Physical Activity (METs/week)                   | 44.4±49.1               | 40.7±41.9                 | 0.296   |
| Sedentary time (hours/day)                      | 6.0±3.6                 | 6.3±3.8                   | 0.249   |
| Energy intake (kcal)                            | 1968.7±603.0            | 1923.2±558.1              | 0.305   |
| Fasting plasma glucose (mg/dL, mmol/L)          | 96.0±9.2<br>(5.33±0.51) | 130.6±23.3<br>(7.25±1.29) | <0.001  |
| HbA <sub>1c</sub> (% , mmol/mol)                | 5.7±0.3<br>(38.8±3.3)   | 6.9±0.7<br>(52.9±7.6)     | <0.001  |

8 Continuous variables are presented as mean ± standard deviation, and categorical variables are shown  
 9 as percentages.

10 P value: an unpaired *t* test or Mann-Whitney *U* test for continuous variables and chi-square tests for  
 11 categorical variables, as appropriate.

12 Abbreviations: HbA<sub>1c</sub>, glycosylated hemoglobin; MMSE: Mini-Mental State Examination.

## 13 Supplementary Table 3. Antidiabetic treatment profile of Study 2

| Medication                      | n   | %     |
|---------------------------------|-----|-------|
| DPP-4 inhibitor                 | 112 | 53.6% |
| Metformin                       | 56  | 26.8% |
| Sulfonylurea                    | 46  | 22.0% |
| $\alpha$ -glucosidase inhibitor | 26  | 12.4% |
| Pioglitazone                    | 11  | 5.3%  |
| Glinide                         | 11  | 5.3%  |
| SGLT2 inhibitor                 | 10  | 4.8%  |
| Insulin                         | 4   | 1.9%  |

14

**Supplementary Figure 1. Time courses of BOLD signal responses in the lateral hypothalamic area following intranasal insulin administration**

(A) Coronal slice displaying subregions in the LHA: anterior lateral hypothalamic area (LHAa, dark red), tuberal lateral hypothalamic area (LHA<sub>t</sub>, light blue), and posterior lateral hypothalamic area (LHA<sub>p</sub>, light green)  
(B-D) Percent signal change (PSC; mean  $\pm$  SEM) from 0 to 30 min relative to intranasal insulin administration (vertical dashed line at 0 min) for the control group ( $\blacktriangle$ ) and the type 2 diabetes (T2D) group ( $\blacksquare$ ): (B) LHAa, (C) LHA<sub>t</sub>, and (D) LHA<sub>p</sub>.  
\*  $p < 0.05$ , \*\*  $p < 0.01$  T2D versus control at the corresponding time point.

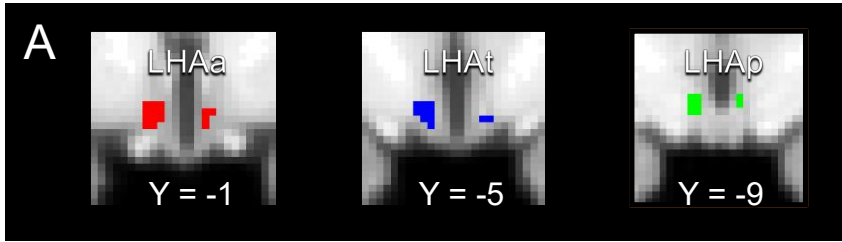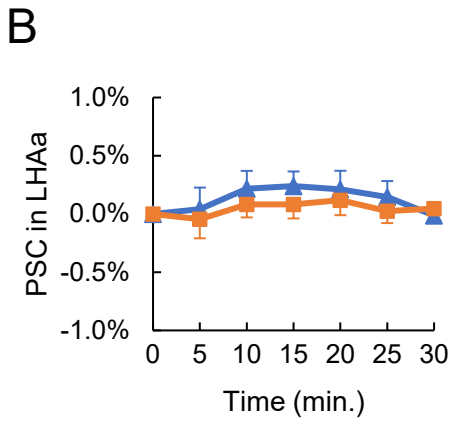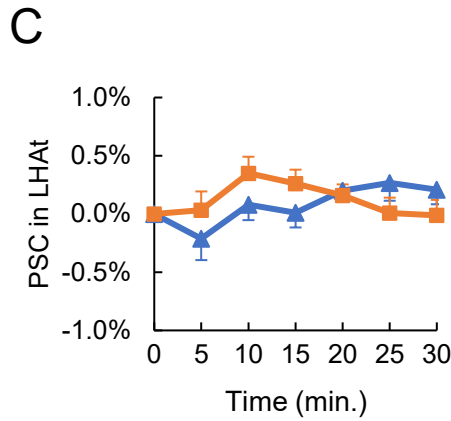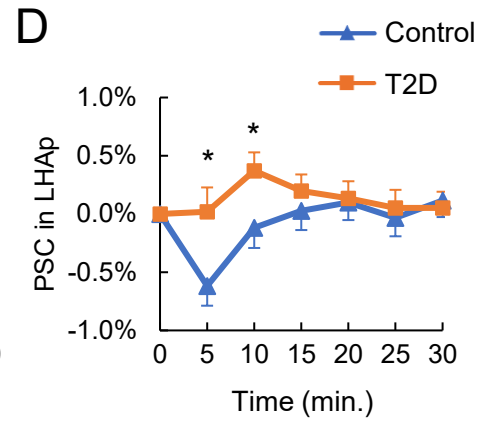

**Supplementary Figure 2. Sanity-check analyses confirming the robustness of the early signal suppression in the PH.**

(A) Sensitivity analysis performed in native space. The fMRI signals were extracted after inversely transforming the primary MNI-derived PH ROI into each participant's native space.

(B) Anatomically anchored analysis. The fMRI signals were extracted using an independent, macroscopic anatomical mask of the posterior hypothalamus derived from a high-resolution structural atlas (Neudorfer et al., 2020).

\*  $p < 0.05$ , \*\*  $p < 0.01$  T2D versus control at the corresponding time point.

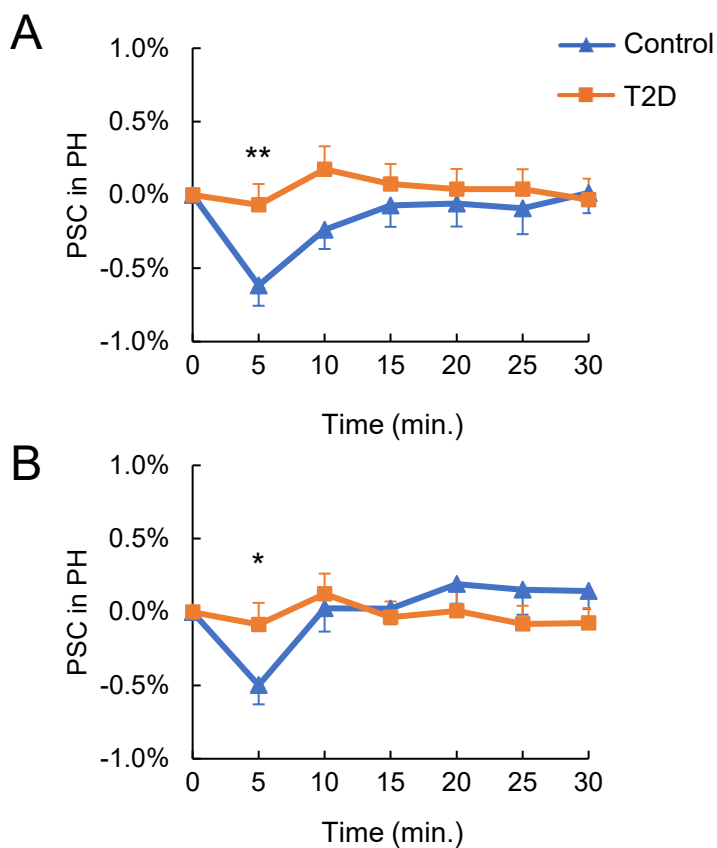

**Supplementary Figure 3. Time courses of BOLD signals for intranasal distilled water administration.**

Comparison of percent signal change in the PH between the insulin-treated healthy control group and an independent healthy cohort treated with intranasal distilled water.

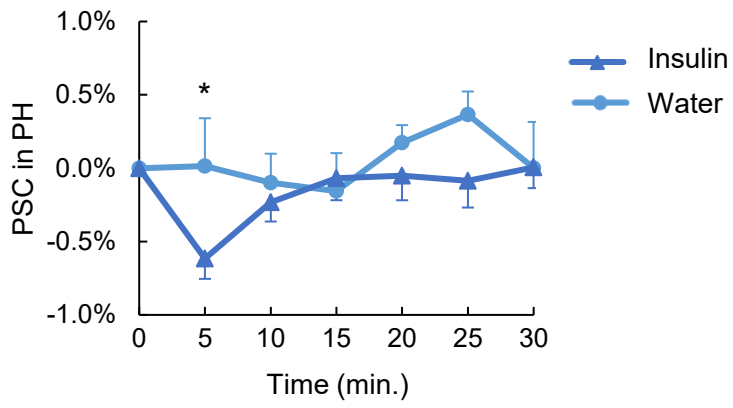

**Supplementary Figure 4. Sanity-check analyses confirming the robustness of the early signal suppression in the PH.**

(A) Box plots comparing gray matter volume in each subdivision (anterior, tuberal, and posterior) between the type 2 diabetes (T2D) and control groups from Study1.

(B) Box plots showing the percent signal change in hypothalamic subdivisions for the T2D and control groups from Study 1.

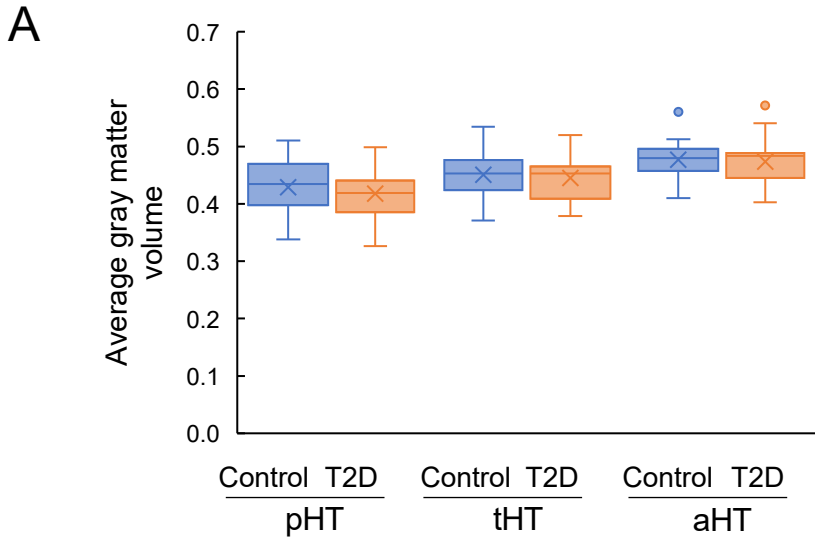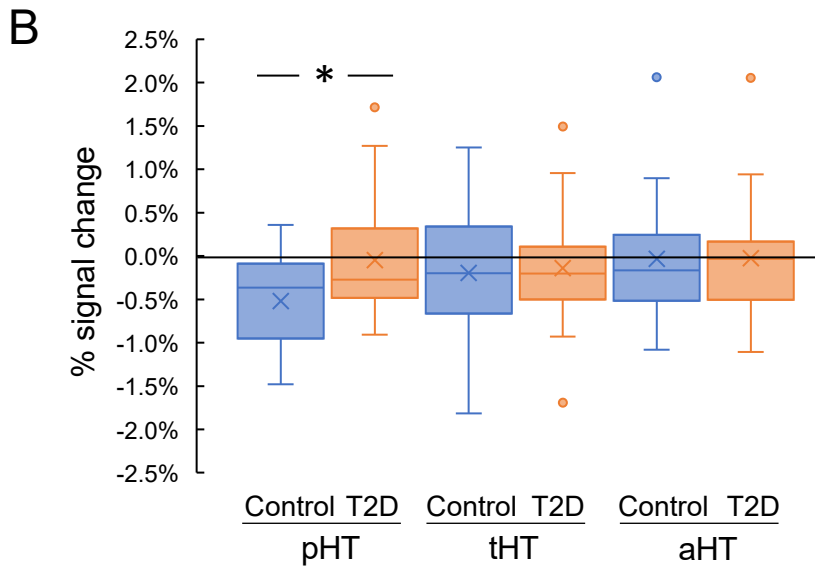

Supplement: sd1 [file 1]
